# Supplementary material for: Mechanistic and microkinetic analysis of CO2 hydrogenation on ceria
Source: Royal Society of Chemistry journal article supplement (doi:10.1039/c5cp07469j), 2016-01-01
Supplement: c5cp07469j1.pdf [file c5cp07469j1.pdf]

## Mechanistic and microkinetic analysis of CO<sub>2</sub> hydrogenation on ceria: Electronic Supplementary Information

Zhuo Cheng and Cynthia S. Lo  
Department of Energy, Environmental and Chemical Engineering  
Washington University  
St. Louis, Missouri, USA.  
Fax: 1 314 935 7211; Tel: 1 314 935 8055; E-mail: clo@wustl.edu

### 1 Reaction Equilibrium and Rate Equations

For the COOH route, we can write the set of equilibrium and rate expressions as follows (based on Figure 1):

$$\begin{aligned}\theta_{\text{CO}_2^*} &= K_1 P_{\text{CO}_2} \theta_*, \\ \theta_{\text{H}^*} &= \sqrt{K_{21} P_{\text{H}_2}} \theta_*, \\ r_2 &= k_{f,2} \theta_{\text{CO}_2^*} \theta_{\text{H}^*} - k_{r,2} \theta_{\text{COOH}^*} \theta_*, \\ r_3 &= k_{f,3} \theta_{\text{COOH}^*} \theta_* - k_{r,3} \theta_{\text{CO}^*} \theta_{\text{OH}^*}, \\ r_7 &= k_{f,7} \theta_{\text{CO}^*} \theta_{\text{H}^*} - k_{r,7} \theta_{\text{HCO}^*} \theta_*, \\ r_8 &= k_{f,8} \theta_{\text{HCO}^*} \theta_{\text{H}^*} - k_{r,8} \theta_{\text{HCOH}^*} \theta_*, \\ r_9 &= k_{f,9} \theta_{\text{HCOH}^*} \theta_{\text{H}^*} - k_{r,9} \theta_{\text{H}_2\text{COH}^*} \theta_*, \\ r_{10} &= k_{f,10} \theta_{\text{H}_2\text{COH}^*} \theta_{\text{H}^*} - k_{r,10} \theta_{\text{H}_3\text{COH}^*} \theta_*, \\ r_{19} &= k_{f,19} \theta_{\text{H}^*} \theta_{\text{OH}^*} - k_{r,19} \theta_{\text{H}_2\text{O}^*} \theta_*, \\ \theta_{\text{CH}_3\text{OH}^*} &= \frac{P_{\text{CH}_3\text{OH}} \theta_*}{K_{18}}, \\ \theta_{\text{H}^*} &= \frac{P_{\text{H}_2\text{O}} \theta_*}{K_{20}}\end{aligned}$$

Since  $r_9$  is the rate-limiting step, all other reaction steps are assumed to follow the pseudo steady state hypothesis. Thus, we can write  $r_2 = r_3 = r_7 = r_8 = r_{10} = r_{19} = 0$  and  $K_i = \frac{k_{f,i}}{k_{r,i}}$ .

From the mass conservation law, we can write:

$$\theta_{\text{CO}_2^*} + \theta_{\text{H}^*} + \theta_{\text{COOH}^*} + \theta_{\text{CO}^*} + \theta_{\text{OH}^*} + \theta_{\text{HCO}^*} + \theta_{\text{HCOH}^*} + \theta_{\text{H}_2\text{COH}^*} + \theta_{\text{H}_3\text{COH}^*} + \theta_{\text{H}_2\text{O}^*} + \theta_* = 1$$

According to the equations above, we thus derive:

$$\begin{aligned}\theta_* &= 1 / \left( 1 + K_1 P_{\text{CO}_2} + \sqrt{K_{21} P_{\text{H}_2}} + K_1 K_2 P_{\text{CO}_2} \sqrt{K_{21} P_{\text{H}_2}} + K_1 K_2 K_3 P_{\text{CO}_2} \sqrt{K_{21} P_{\text{H}_2}} \right. \\ &+ \frac{K_{18} P_{\text{CH}_3\text{OH}}}{K_{10} \sqrt{K_{21} P_{\text{H}_2}}} + \frac{K_{18} P_{\text{CH}_3\text{OH}}}{K_{21} K_8 K_9 K_{10} \sqrt{K_{21} P_{\text{H}_2}}} + \frac{K_{18} P_{\text{CH}_3\text{OH}}}{K_{21} K_9 K_{10} P_{\text{H}_2}} \\ &\left. + \frac{K_{18} P_{\text{CH}_3\text{OH}}}{(K_{21})^2 K_7 K_8 K_9 K_{10} K_{19} (P_{\text{H}_2})^2} + \frac{P_{\text{CH}_3\text{OH}}}{K_{18}} + \frac{P_{\text{H}_2\text{O}}}{K_{20}} \right)\end{aligned}$$

Thus, we can calculate the TOF of the COOH route, based on the rate-limiting step:

$$r_9 = k_{f,9} \left( K_1 K_2 K_3 P_{\text{CO}_2} \sqrt{K_{21} P_{\text{H}_2}} \right) \sqrt{K_{21} P_{\text{H}_2}} \theta_* - k_{r,9} \left\{ \frac{P_{\text{CH}_3\text{OH}} \theta_*}{(K_{21})^2 K_7 K_8 K_9 K_{10} K_{19} (P_{\text{H}_2})^2} \right\} \left( \frac{P_{\text{H}_2\text{O}} \theta_*}{K_{20}} \right)$$

All  $k_{f,i}$  and  $k_{r,i}$  can be obtained from TST, as described in the manuscript.  $P_{\text{H}_2\text{O}}$ ,  $P_{\text{CH}_3\text{OH}}$ ,  $P_{\text{H}_2}$ , and  $P_{\text{CO}_2}$  are calculated assuming that the conversion is 0.052 (as obtained from the van't Hoff equation when  $P_{\text{H}_2}:P_{\text{CO}_2} = 1:1$ ), and the total pressure,  $P \in \{1, 10, 50, 100\}$  atm. Similar expressions can thus be derived for the HCOO route.
